# Supplementary material for: Regulation of autophagy by nucleoporin Tpr
Source: PubMed Central journal article supplement — Sci Rep. 2012 Nov 20;2:878. doi: 10.1038/srep00878 (PMC3501823; doi:10.1038/srep00878), 2012-11-20
Supplement: srep00878-s1.pdf [file srep00878-s1.pdf]

## Regulation of autophagy by nucleoporin Tpr

Tatsuyoshi Funasaka<sup>1</sup>, Eriko Tsuka<sup>1</sup> and Richard W. Wong<sup>1,2</sup>

### Supplemental information

#### Supplemental Figure legends

**Supplemental Figure 1.** Electron microscopic images of nuclear pores (arrows) in control or Tpr siRNA-transfected HeLa cells. Tangential section is showing the pores in a frontal view. Scale bars, 0.25  $\mu\text{m}$ .

**Supplemental Figure 2.** Tpr interacts with both wild-type and mutant p53. HCT116 (wild-type p53) and SW480 (mutant p53) cell lysates were immunoprecipitated with anti-Tpr, -p53, or nonspecific rabbit antibodies (IgG) followed by immunoblot analysis for Tpr and p53 expression. Cell lysates were also immunoblotted as a control (Input). IP, immunoprecipitation.

**Supplemental Figure 3.** Tpr depletion induces autophagy, but not apoptosis. (A) HeLa cells were transfected with control or Tpr siRNA for 72 h and apoptotic cells were detected by TUNEL assay. Scale bars, 20  $\mu\text{m}$ . (B) HeLa cells were transfected with control or Tpr siRNA for 72 h and apoptotic cells were detected by DNA ladder analysis. Cells treated with 3  $\mu\text{M}$  staurosporine for 5 h served as positive control. Extracted DNA was separated on 2% agarose gels to visualize apoptotic DNA ladders. (C) Electron microscopy shows the ultrastructure of HeLa cells transfected with control or Tpr siRNA for 72 h. Scale bars, 10  $\mu\text{m}$ .

**Supplemental Table 1.** Sequences of PCR primers used in this study.

**Control**

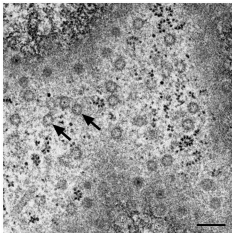

**Tpr RNAi**

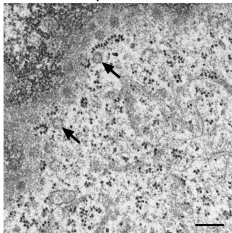

**Funasaka et al. \_Supplemental Figure 1**

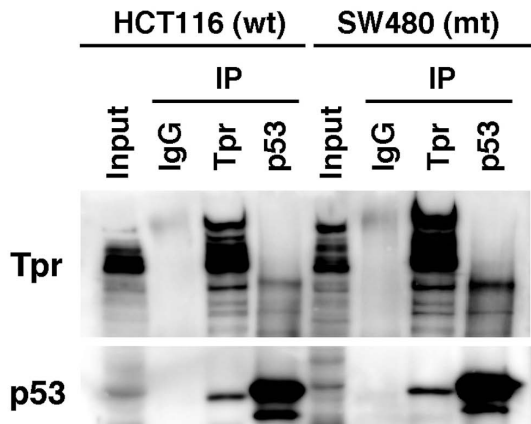

**Funasaka et al.\_Supplemental Figure 2**

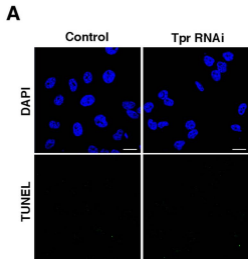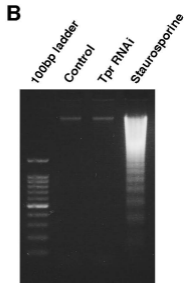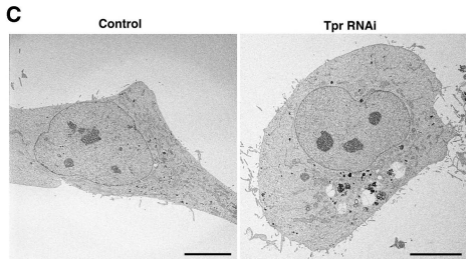

**Supplemental Table 1. PCR primers**

| target   | 5' primer            | 3' primer            |
|----------|----------------------|----------------------|
| DRAM     | CATCCCCATGATTGTCTGTG | AAAGGCCACTGTCCATTCAC |
| PUMA     | GACGACCTCAACGCACAGTA | CTGGGTAAGGGCAGGAGTC  |
| p21      | GACACCACTGGAGGGTACT  | CTGCCTCCTCCCAACTCAT  |
| LC3      | CTGTTGGTGAACGGACACAG | CTGGGAGGCATAGACCATGT |
| Beclin-1 | CGGCTCCTATTCCATCAAAA | AATTGTGAGGACACCCAAGC |
| Atg3     | TTTGGCTATGATGAGCAACG | GTGGCAGATGAGGGTGATTT |
| Atg5     | TGATCCTGAAGATGGGGAAA | TCCGGGTAGCTCAGATGTTC |
| Atg7     | GAACATGGTGCTGGTTTCCT | CATCCAGGGTACTGGGCTAA |
| Atg12    | CTTACGGATGTCTCCCCAGA | TGTCTCCCACAGCCTTTAGC |
| HSF1     | GCCATGAAGCATGAGAATGA | CTGCACCAGTGAGATCAGGA |
| HSP70    | GAAAATGAGGAGCCAATGGA | TGTCTGCTGCTGTTGCTCTT |
| Tpr      | AGTTGGGACCACCAGTTCAG | TGCCACCTATTCCTGGAGTC |
| GAPDH    | CAGCCTCAAGATCATCAGCA | TGTGGTCATGAGTCCTTCCA |
